# Supplementary material
Source: MDPI journal article supplement (https://www.mdpi.com/2073-445X/11/5/660)
Supplement: s1 [file s1]

**Table S1.** The detection functions, adjustments and values of Akaike information criterion (AIC) in the distance sampling for the Tibetan wild ass at the Three-River Source National Park.

| ID | Key  | Adjustment | AIC      | $\Delta AIC$ |
|----|------|------------|----------|--------------|
| 5  | unif | herm       | 1263.690 | 0            |
| 4  | unif | cos        | 1276.605 | 12.915       |
| 6  | unif | poly       | 1276.961 | 13.271       |
| 1  | hn   | cos        | 1278.443 | 14.753       |
| 2  | hn   | herm       | 1278.443 | 14.753       |
| 3  | hn   | poly       | 1278.443 | 14.753       |
| 7  | hr   | cos        | 1278.659 | 14.969       |
| 8  | hr   | herm       | 1278.659 | 14.969       |
| 9  | hr   | poly       | 1278.659 | 14.969       |

**Table S2.** Variables used in the species distribution model for the Tibetan wild ass in the Three-River Source National Park. The variable names used in the models are in parentheses.

| Variables                                                        | Parameters |         |         |       | Unit                               | Citation |
|------------------------------------------------------------------|------------|---------|---------|-------|------------------------------------|----------|
|                                                                  | Mean       | Minimum | Maximum | SD    |                                    |          |
| 19 variables for temperature and precipitation (bio_1 to bio_19) | /          | /       | /       | /     | /                                  | [33]     |
| Elevation (elev)                                                 | 4374       | 2569    | 6358    | 621   | m                                  | [34]     |
| Human footprint index (footprint)                                | 11.38      | 4.00    | 43.12   | 5.63  | /                                  | [35]     |
| Solar radiation in January (solar1)                              | 8516       | 7956    | 11771   | 569   | $\text{kJ m}^{-2} \text{day}^{-1}$ | [33]     |
| Solar radiation in July (solar7)                                 | 19829      | 16822   | 22918   | 1115  | $\text{kJ m}^{-2} \text{day}^{-1}$ | [33]     |
| Water vapor pressure in January (vapor1)                         | 0.08       | 0.03    | 0.14    | 0.015 | kPa                                | [33]     |
| Water vapor pressure in July (vapor7)                            | 0.67       | 0.35    | 1.04    | 0.11  | kPa                                | [33]     |
| Wind speed in January (wind1)                                    | 3.35       | 1.5     | 6.7     | 0.65  | $\text{m s}^{-1}$                  | [33]     |
| Wind speed in July (wind7)                                       | 2.83       | 1.4     | 6.1     | 0.44  | $\text{m s}^{-1}$                  | [33]     |

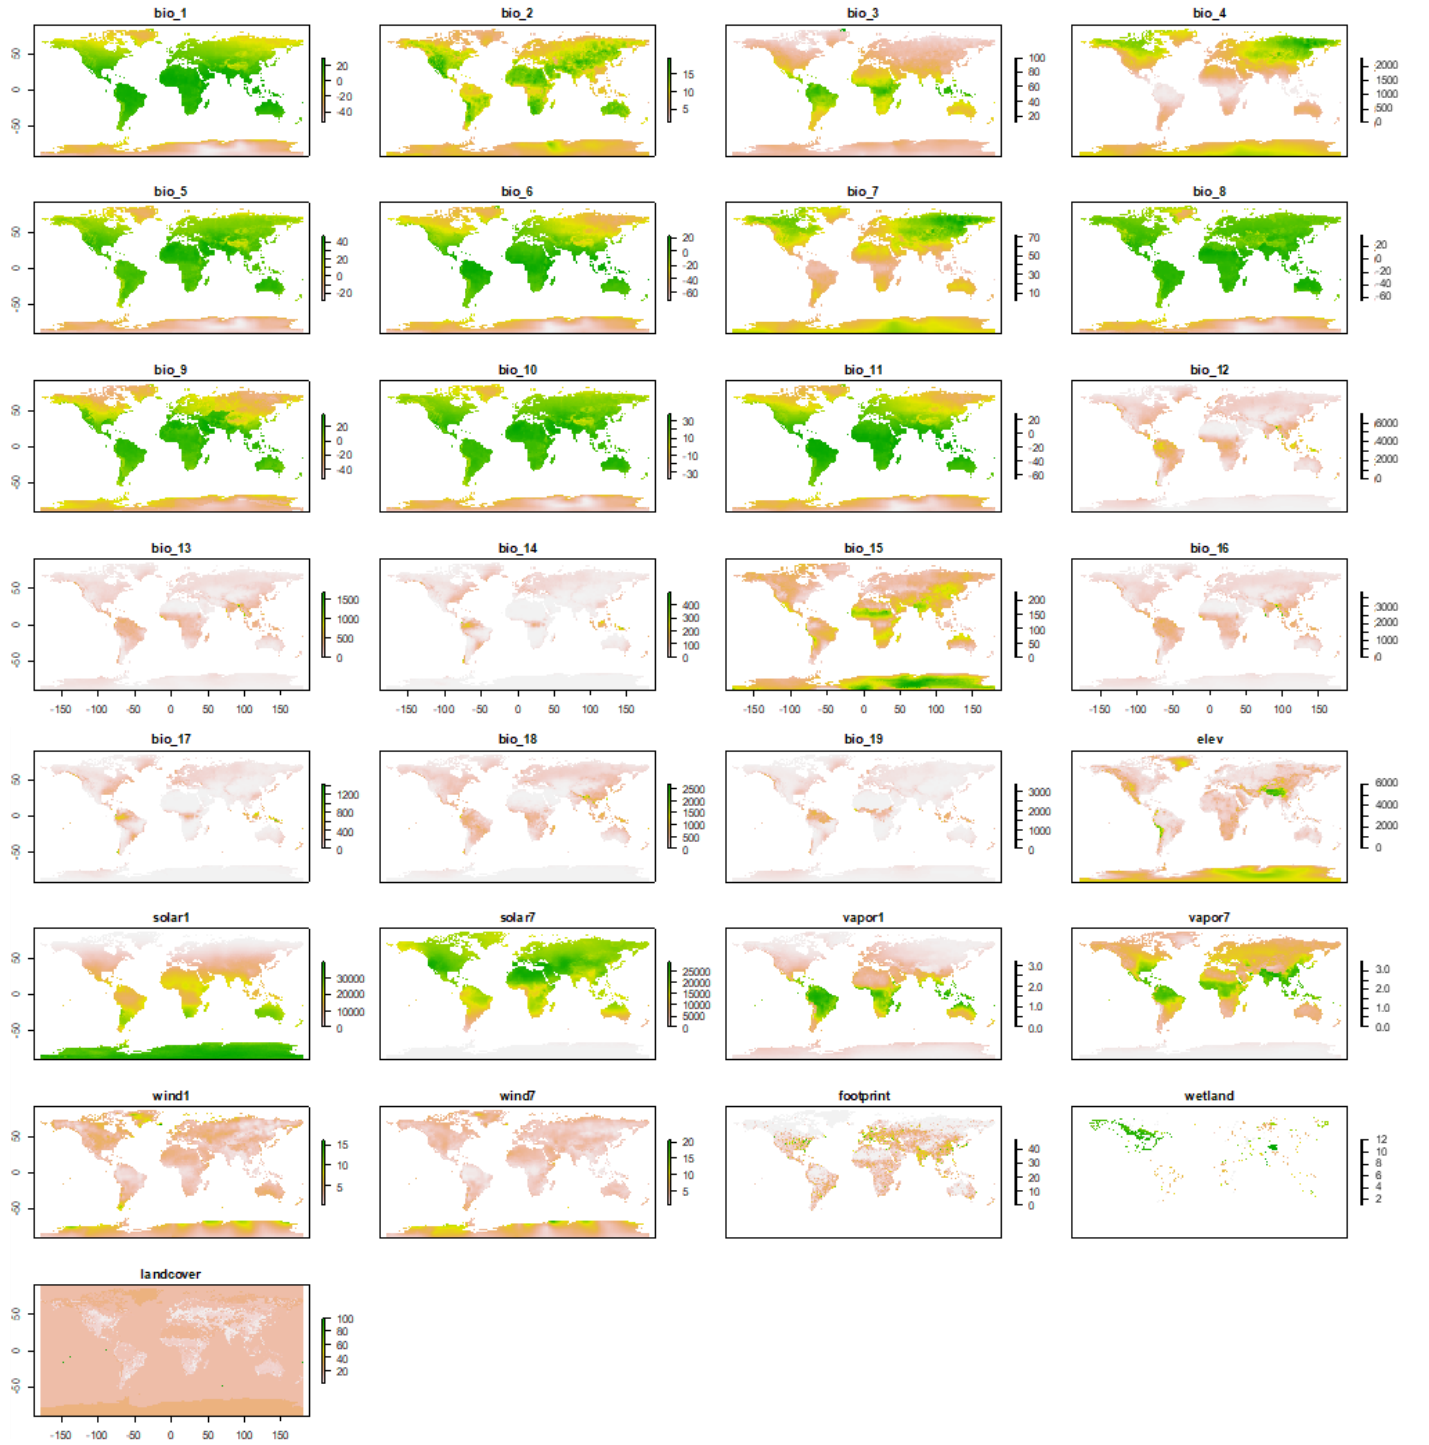

**Figure S1.** The 29 environmental variables for species distribution modelling. The variables include the 19 climate variables [33], elevation [34], human footprint index [35], and solar radiation, wind speed, and water vapor pressure for January and July, respectively, as well as land cover [36] and wetland [37]. All the 29 layers have the spatial resolution of 1 km<sup>2</sup>.

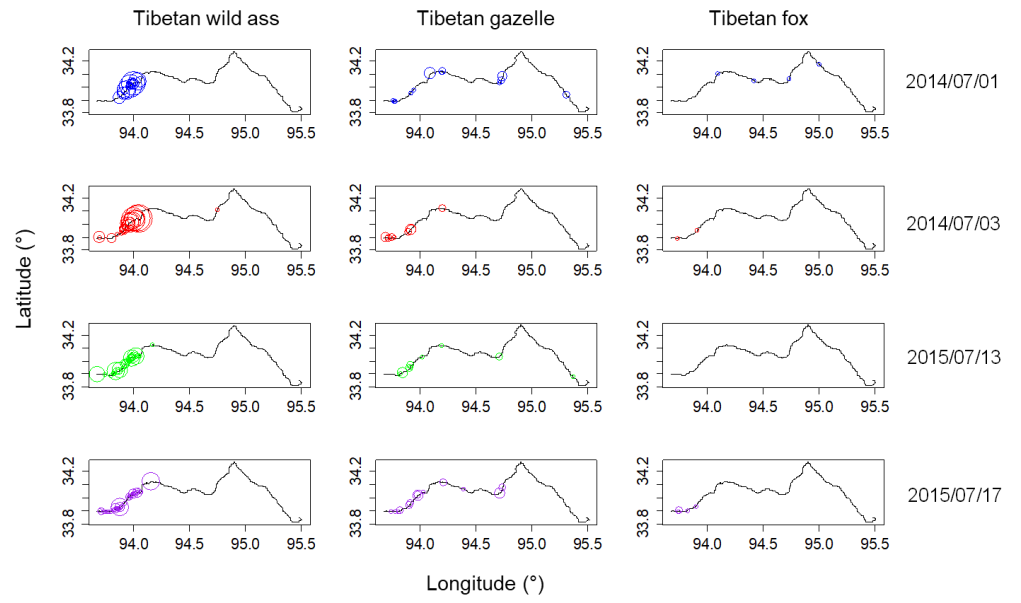

**Figure S2.** The occurrences and group sizes of the Tibetan wild ass, Tibetan gazelle, and Tibetan fox surveyed on four different days on a 250-km road in the Three-River Source National Park.
